# Supplementary material
Source: MDPI journal article supplement (https://www.mdpi.com/2073-4441/15/9/1782)
Supplement: s1 [file s1 › water-2366688-supplementary.pdf]

## *Supplementary material*

# Composite polysilicate metal coagulants for simultaneous removal of organic matter, phosphorus, and ammonium-nitrogen: effects of metal/silicate molar ratio and basicity

**Hanxu Guo<sup>1</sup>, Peng Li<sup>2</sup>, Lianfeng Du<sup>2,\*</sup>, Guoyuan Zou<sup>2</sup> and Xuan Guo<sup>2,\*</sup>**

<sup>1</sup> School of Mechanical Engineering, Tiangong University, Tianjin 300387, China

<sup>2</sup> Institute of Plant Nutrition, Resources and Environment, Beijing Academy of Agriculture and Forestry Sciences, Beijing 100097, China

\* Correspondence: ytzxguoxuan@126.com (XG); dulianfengyzs@163.com (LD)

### **1. Determination of floc size at the end of coagulation.**

At the end of coagulation process, the floc sizes of CSM (M/Si = 2:1, 3:1, and 4:1), PSiA, and PFS were determined using small-angle-laser light-scattering (SALS) equipment (Mastersizer 2000; Malvern, UK).

**Table S1.** Comparison of coagulation performance between CSM and traditional coagulants

(FeCl<sub>3</sub> and Al<sub>2</sub>(SO<sub>4</sub>)<sub>3</sub>) at the same dosage (80 mg/L)

| NO. | Coagulants                                      | Removal efficiency (%) |      |                                  |                                 |
|-----|-------------------------------------------------|------------------------|------|----------------------------------|---------------------------------|
|     |                                                 | SS                     | COD  | PO <sub>4</sub> <sup>3-</sup> -P | NH <sub>4</sub> <sup>+</sup> -N |
| 1   | CSM (M/Si=3:1)                                  | 96±2                   | 64±3 | 98±1                             | 33±2                            |
| 2   | FeCl <sub>3</sub>                               | 78±3                   | 51±2 | 86±2                             | 3±1                             |
| 3   | Al <sub>2</sub> (SO <sub>4</sub> ) <sub>3</sub> | 76±2                   | 47±3 | 83±2                             | 2±1                             |

**Table S2.** Floc size of different coagulants at the end of coagulation processes

| NO. | Coagulants     | Floc size (μm) |
|-----|----------------|----------------|
| 1   | CSM (M/Si=2:1) | ~510           |
| 2   | CSM (M/Si=3:1) | ~612           |
| 3   | CSM (M/Si=4:1) | ~561           |
| 4   | PSiA           | ~280           |
| 5   | PFS            | ~400           |
